# Supplementary material for: Community Health Survey of Residents Living Near a Solid Waste Open Dumpsite in Sabak, Kelantan, Malaysia
Source: PubMed Central journal article supplement (PMC6981880; doi:10.3390/ijerph17010311), 2020-01-02
Supplement: ijerph-17-00311-s001.pdf [file ijerph-17-00311-s001.pdf]

## QUESTIONNAIRES ON HEALTH STATUS OF RESIDENTS LIVING NEAR SABAK DUMPSITE

### A. SOCIO-DEMOGRAPHY

Address: \_\_\_\_\_

Tel no: \_\_\_\_\_ Birthdate: \_\_\_\_\_ Age: \_\_\_\_\_

Sex: Male  Female

Race: Malay  Chinese  Indian  Siamese  Others

Occupation: Housewife  unemployed  private sector  government sector  self-employed

State your occupation : \_\_\_\_\_

Do you work in factory?, state type of factory \_\_\_\_\_

Total monthly household income (RM): \_\_\_\_\_

Education level: none  SRP / PMR  SPM  STPM/Diploma  degree/post-graduate

Date begin living in this village (minimum one year): \_\_\_\_\_

Source of drinking water: Tube well  Dug well  Kelantan Water  Others , state \_\_\_\_\_

Do you smoke? Yes  No  Ex-smoker

If yes, how many stick per day \_\_\_\_\_ If previous smoker, how long you have quitted? \_\_\_\_\_

Any family member who smoke? Yes  No  if yes, how many? \_\_\_\_\_

Do you regularly collect any waste from the landfill? Yes  No

Do you grow your own vegetables for own consumption? Yes  No

Do you breed chickens for own consumption? Yes  No

### B. SYMPTOMS

Have you / your family experienced the following problems in the last 3 months and how often?

|                                      | Yes                      | If yes, who? How often? | No                       |
|--------------------------------------|--------------------------|-------------------------|--------------------------|
| 1. Itching or irritation in the eyes | <input type="checkbox"/> | _____                   | <input type="checkbox"/> |
| 2. Skin rashes                       | <input type="checkbox"/> | _____                   | <input type="checkbox"/> |
| 3. Itching or irritation of nose     | <input type="checkbox"/> | _____                   | <input type="checkbox"/> |
| 4. Headache                          | <input type="checkbox"/> | _____                   | <input type="checkbox"/> |

5. Excessive tiredness of doing daily chores  \_\_\_\_\_
6. Excessive day time sleepiness  \_\_\_\_\_
7. Sore throat  \_\_\_\_\_
8. Diarrhea  \_\_\_\_\_
9. Stomachache  \_\_\_\_\_

**C. DIAGNOSED DISEASES/ILLNESS**

Have you / your family member been or are currently suffering from the following illnesses?

| Disease certified by a doktor | Yes | No | Date diagnosed | Date admission in hospital & reason? |
|-------------------------------|-----|----|----------------|--------------------------------------|
| Tuberculosis (TB)             |     |    |                |                                      |
| Asthma                        |     |    |                |                                      |
| Pneumonia                     |     |    |                |                                      |
| Typhoid fever                 |     |    |                |                                      |
| Cholera                       |     |    |                |                                      |
| Dengue fever                  |     |    |                |                                      |
| Hepatitis A                   |     |    |                |                                      |
| Food poisoning                |     |    |                |                                      |
| Diabetes mellitus             |     |    |                |                                      |
| Hypertension                  |     |    |                |                                      |
| Cancer, <i>state site</i>     |     |    |                |                                      |
| Ischemic eart disease         |     |    |                |                                      |
| Epilepsy                      |     |    |                |                                      |
| Enuresis (children)           |     |    |                |                                      |
| Learning problem (children)   |     |    |                |                                      |
| Hyperactive children          |     |    |                |                                      |

**D. CHILD AND MATERNAL HEALTH**

No of children: \_\_\_\_\_ No of living children \_\_\_\_\_

Miscarriage(1-9-1996 till now): Yes  No  If yes, state when & number of miscarriage \_\_\_\_\_

No of child death (1-9-1996 till now) \_\_\_\_\_

Please provide details of children born 1-9-1996 to the present (or have been living in the area for at least a year). See the antenatal card or hospital card.

| BIRTHDATE | SEX<br>M/F | BIRTH<br>WEIGHT<br>(kg) | GESTATION<br>(wk) | MOTHER<br>AGE | COMPLICATION<br>DURING<br>PREGNANCY<br>(Yes/No)<br>State details | CONGENITAL<br>ANOMALIES<br>(Yes/No)<br>State details | DEATH <5y<br>(Yes/No)<br>State detail |
|-----------|------------|-------------------------|-------------------|---------------|------------------------------------------------------------------|------------------------------------------------------|---------------------------------------|
|           |            |                         |                   |               |                                                                  |                                                      |                                       |
|           |            |                         |                   |               |                                                                  |                                                      |                                       |
|           |            |                         |                   |               |                                                                  |                                                      |                                       |
|           |            |                         |                   |               |                                                                  |                                                      |                                       |
|           |            |                         |                   |               |                                                                  |                                                      |                                       |
|           |            |                         |                   |               |                                                                  |                                                      |                                       |
|           |            |                         |                   |               |                                                                  |                                                      |                                       |
|           |            |                         |                   |               |                                                                  |                                                      |                                       |
|           |            |                         |                   |               |                                                                  |                                                      |                                       |
|           |            |                         |                   |               |                                                                  |                                                      |                                       |
|           |            |                         |                   |               |                                                                  |                                                      |                                       |
|           |            |                         |                   |               |                                                                  |                                                      |                                       |
|           |            |                         |                   |               |                                                                  |                                                      |                                       |
|           |            |                         |                   |               |                                                                  |                                                      |                                       |
|           |            |                         |                   |               |                                                                  |                                                      |                                       |
|           |            |                         |                   |               |                                                                  |                                                      |                                       |
|           |            |                         |                   |               |                                                                  |                                                      |                                       |
|           |            |                         |                   |               |                                                                  |                                                      |                                       |
|           |            |                         |                   |               |                                                                  |                                                      |                                       |
|           |            |                         |                   |               |                                                                  |                                                      |                                       |

**THANK YOU FOR YOUR COOPERATION**
